# Supplementary material
Source: publisher site journal article supplement (https://mycokeys.pensoft.net/article/32335/download/suppl/31/)
Supplement: Supplementary file 1

Petrželová and Sochor: **How useful is the current species recognition concept for the determination of true morels? Insights from the Czech Republic**

**Supplementary table 1**. List of localities of mulch morels from which more than one ascoma was analyzed.

| Location | GPS coordinates | Coll. year | Ascomata analyzed | Determined phylospecies |
| --- | --- | --- | --- | --- |
| Olomouc-Holice, new park in the Palacký University campus | 49º 34' 29" N, 17º 16' 52" E | 2015 | 12 | Mel-10 |
| Olomouc-Holice, Centre of the Region Haná | Bed1: 49° 34' 26" N, 17° 16' 57" E  Bed2: 49° 34' 26" N, 17° 16' 48" E | 2014  2014 | 3  2 | Mel-10  Mel-10 |
| Olomouc, Demlova St. | 49º 36' 10" N, 17º 15' 40" E | 2015 | 4 | Mel-10 |
| Olomouc, Šmeralova St. | 49º 35' 33" N, 17º 16' 00" E | 2014 | 4 | Mel-10 |
| Olomouc, Šantova St. | 49º 35' 11" N, 17º 15' 26" E | 2014 | 5 | Mel-10 |
| Olomouc-Hodolany, Kavaleristů St. | 49º 35' 34" N, 17º 16' 12" E | 2014 | 3 | Mel-10 |
| Olomouc-Hodolany, Nezvalova 2a | 49º 35' 30" N, 17º 16' 11" E | 2014 | 3 | Mel-10,  Mel-39 |
| Olomouc-Hodolany, Kosmonautů 1 | 49º 35' 28" N, 17º 16' 02" E | 2014 | 2 | Mel-10 |
| Posluchov 31 | 49º 38' 02" N, 17º 23' 29" E | 2014 | 3 | Mel-10 |
